# Supplementary material
Source: Springer Nature journal article supplement (https://www.springermedizin.de/resource/supplementary/13223_2013_401_MOESM1_ESM.pdf/9597834)

## Supplementary file 1

Vitamin C and common cold-induced asthma:  
a systematic review and statistical analysis  
Harri Hemilä

Flow diagram of the literature search September 2013

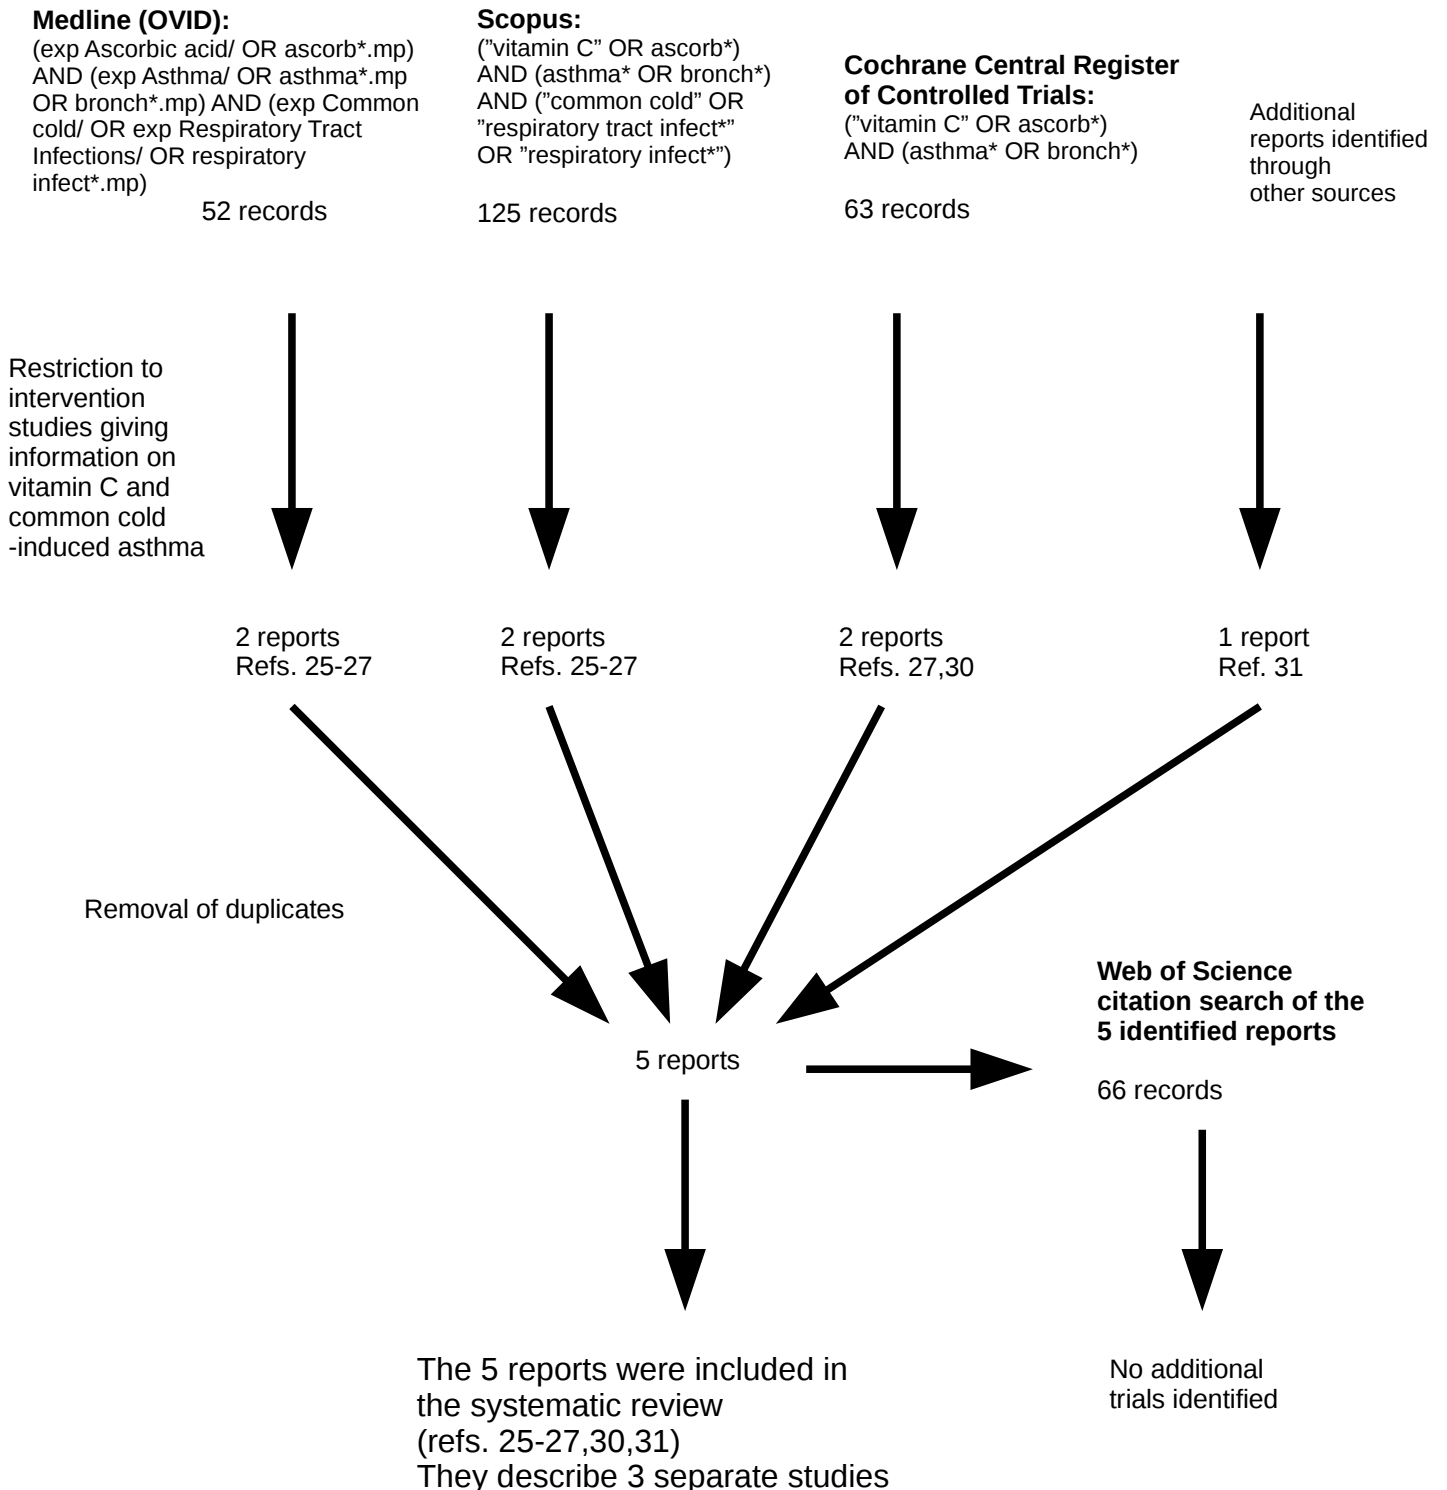

Supplement: MOESM1 [file 9597834]
